# Supplementary material for: Poly(Alkylene 2,5-Thiophenedicarboxylate) Polyesters: A New Class of Bio-Based High-Performance Polymers for Sustainable Packaging
Source: MDPI journal article supplement (doi:10.3390/polym13152460), 2021-07-27
Supplement: s1 [file s1]

## Supplementary Materials

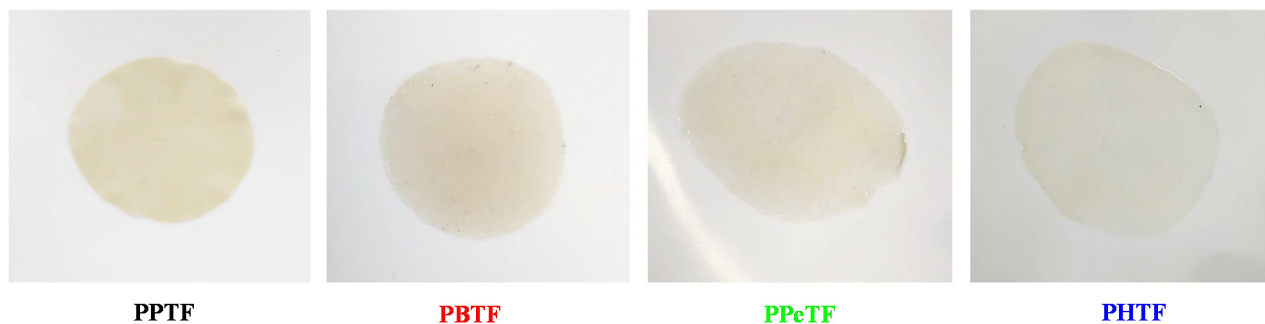

**Figure S1.** Pictures of compression moulded films.

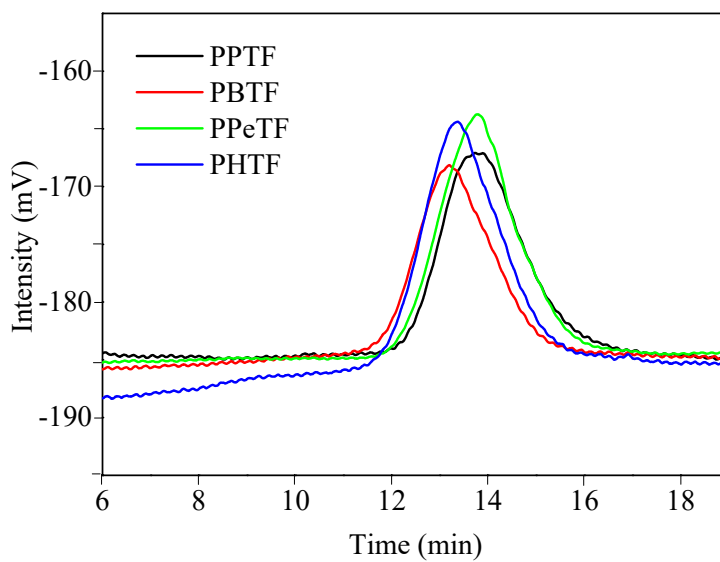

**Figure S2.** Chromatograms of the synthesized polymers.

**Table S1.** DSC data of the homopolymers under study in form of purified powders.

|       | I scan      |                       |             |                     | II scan     |                       |                |                        |             |                     |
|-------|-------------|-----------------------|-------------|---------------------|-------------|-----------------------|----------------|------------------------|-------------|---------------------|
|       | $T_g$<br>°C | $\Delta c_p$<br>J/g°C | $T_m$<br>°C | $\Delta H_m$<br>J/g | $T_g$<br>°C | $\Delta c_p$<br>J/g°C | $T_{cc}$<br>°C | $\Delta H_{cc}$<br>J/g | $T_m$<br>°C | $\Delta H_m$<br>J/g |
| PPTF  | n.d         | n.d                   | 183         | 33                  | 38          | 0.306                 | 103            | 32                     | 183         | 33                  |
| PBTF  | 25          | 0.130                 | 147         | 33                  | 25          | 0.320                 | 93             | 23                     | 147         | 23                  |
| PPeTF | 4           | 0.128                 | 67          | 29                  | 4           | 0.324                 | -              | -                      | -           | -                   |
| PHTF  | 5           | 0.136                 | 59<br>89    | 10<br>32            | 1           | 0.356                 | -              | -                      | -           | -                   |

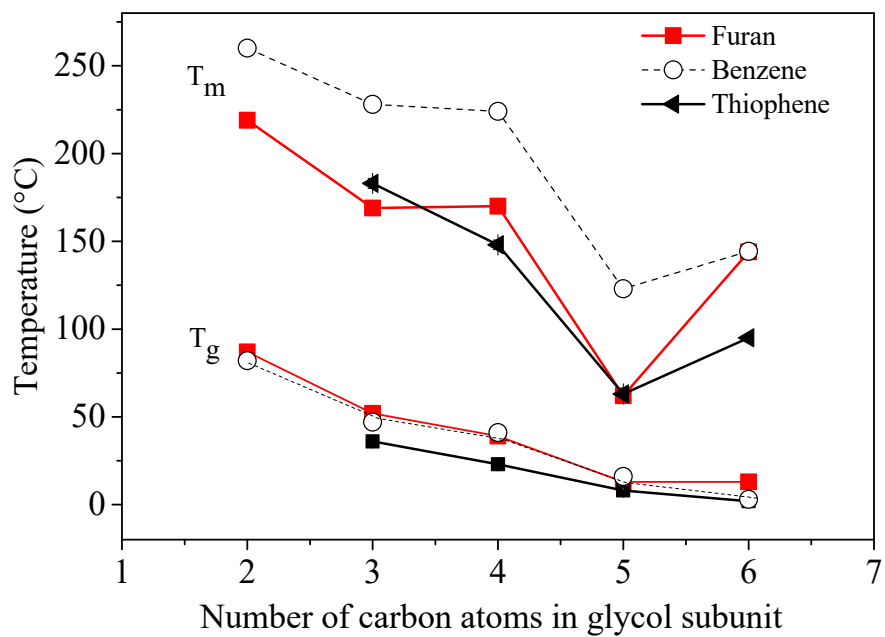

**Figure S3.**  $T_g$  and  $T_m$  trends as a function of glycolic subunit length for thiophene ring- ( $\blacktriangle$ ) containing polyesters compared to furan ring- ( $\blacksquare$ ) and benzene ring- ( $\circ$ ) containing ones [29].
